# Supplementary material for: Antibody responses to α-Gal in African children vary with age and site and are associated with malaria protection
Source: PubMed Central journal article supplement (PMC6030195; doi:10.1038/s41598-018-28325-w), 2018-07-03
Supplement: 41598_2018_28325_MOESM1_ESM.pdf [file 41598_2018_28325_MOESM1_ESM.pdf]

## **Antibody responses to $\alpha$ -Gal in African children vary with age and site and are associated with malaria protection**

Ruth Aguilar<sup>1</sup>, Itziar Ubillos<sup>1</sup>, Marta Vidal<sup>1</sup>, Núria Balanza<sup>1</sup>, Núria Crespo<sup>1</sup>, Alfons Jiménez<sup>1</sup>, Augusto Nhabomba<sup>2</sup>, Chenjerai Jairoce<sup>2</sup>, David Dosoo<sup>3</sup>, Ben Gyan<sup>3</sup>, Aintzane Ayestaran<sup>1</sup>, Hèctor Sanz<sup>1</sup>, Joseph J. Campo<sup>1</sup>, Gloria P. Gómez-Pérez<sup>1</sup>, Luis Izquierdo<sup>1\*</sup>, Carlota Dobaño<sup>1\*</sup>

### **Affiliations**

<sup>1</sup> ISGlobal, Hospital Clínic - Universitat de Barcelona, Carrer Rosselló 153 (CEK building), E-08036 Barcelona, Catalonia, Spain.

<sup>2</sup> Centro de Investigação em Saúde de Manhiça (CISM), Rua 12, Cambeve, Vila de Manhiça, CP 1929, Maputo, Mozambique.

<sup>3</sup> Kintampo Health Research Center, Kintampo, Ghana.

\* Corresponding authors: Luis Izquierdo (luis.izquierdo@isglobal.org) and Carlota Dobaño (carlota.dobano@isglobal.org)

## SUPPLEMENTARY MATERIAL

**Supplementary Figure 1. Scatter plots with lines representing the distribution of anti- $\alpha$ -Gal IgG and IgM levels in children between 1 and 4 years old stratified by site (Manhiça and Ilha Josina). Data correspond to samples collected at baseline (M0) from children participants in the RTS,S Phase 2b clinical trial.**

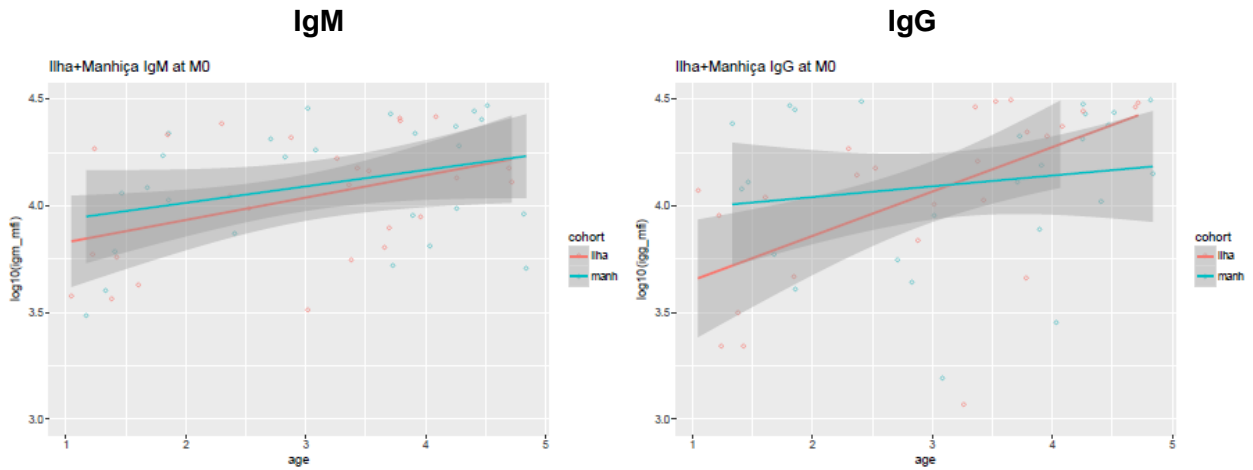

## Supplementary Figure 2. Anti- $\alpha$ -Gal antibody levels by time-points in infants and children.

Data correspond to samples collected at baseline (M0) and 3 months after vaccination (M3) from participants in the RTS,S phase 3 clinical trial from Manhiça and Kintampo (both sites together). Boxplots represent the median and interquartile range. Groups were compared through t-tests and p-values were adjusted for multiple comparisons through Benjamini-Hochberg and Holm (in parenthesis). Infants: 1.5-3 months; Children: 5-17 months.

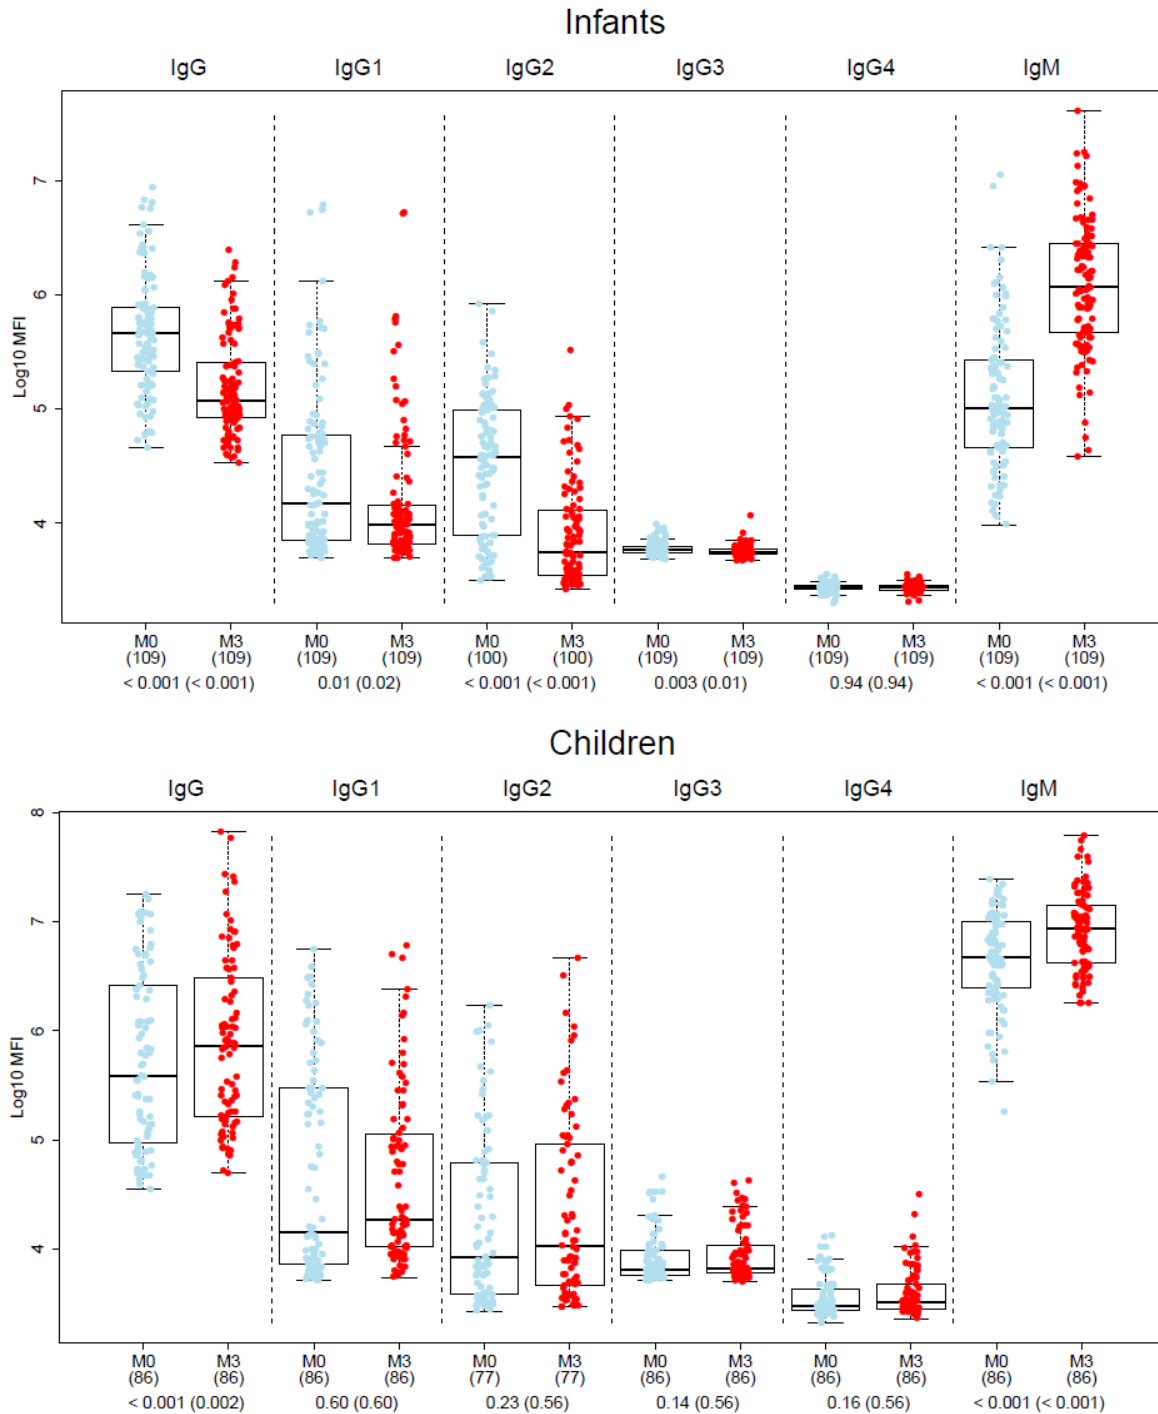

**Supplementary Figure 3. Change in anti- $\alpha$ -Gal IgG and IgM levels between time-points in infants and children. A)** Both sites together. **B)** Stratified by site. Trajectory plot data correspond to samples collected at baseline (M0) and 3 months after vaccination (M3) from participants in the RTS,S phase 3 clinical trial.

**A**

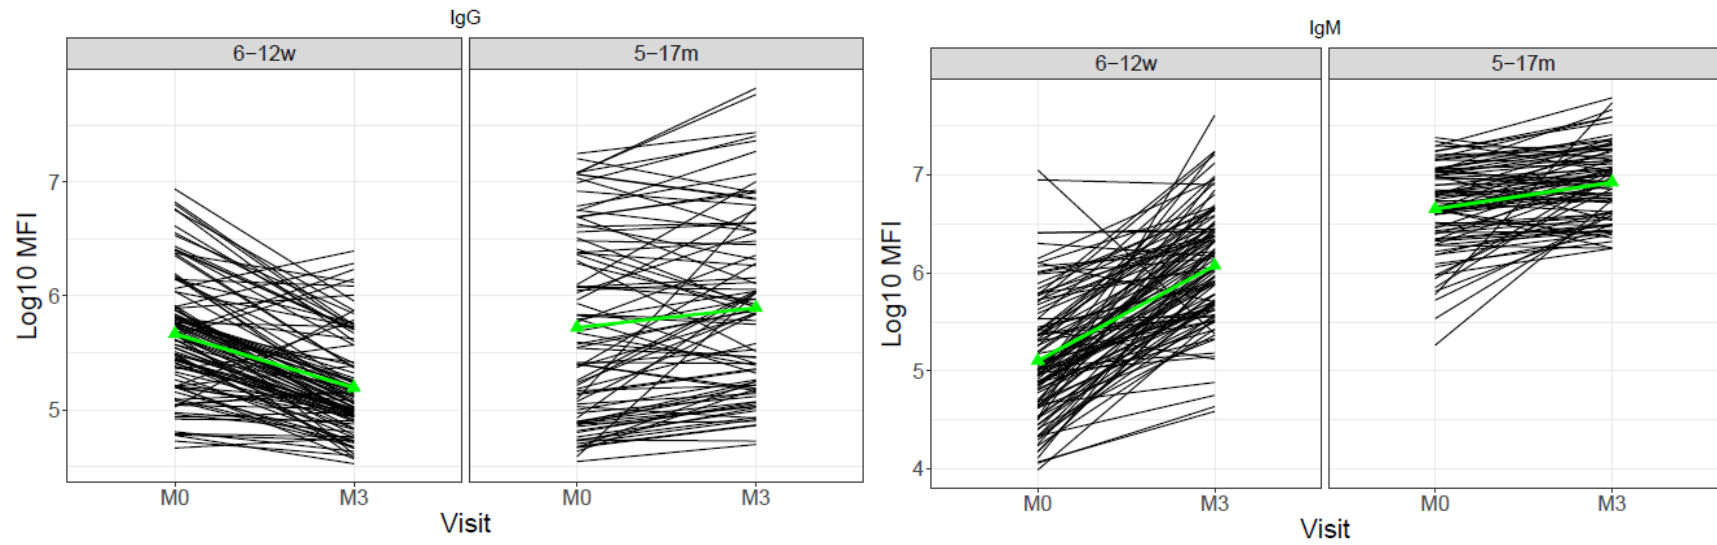

**B**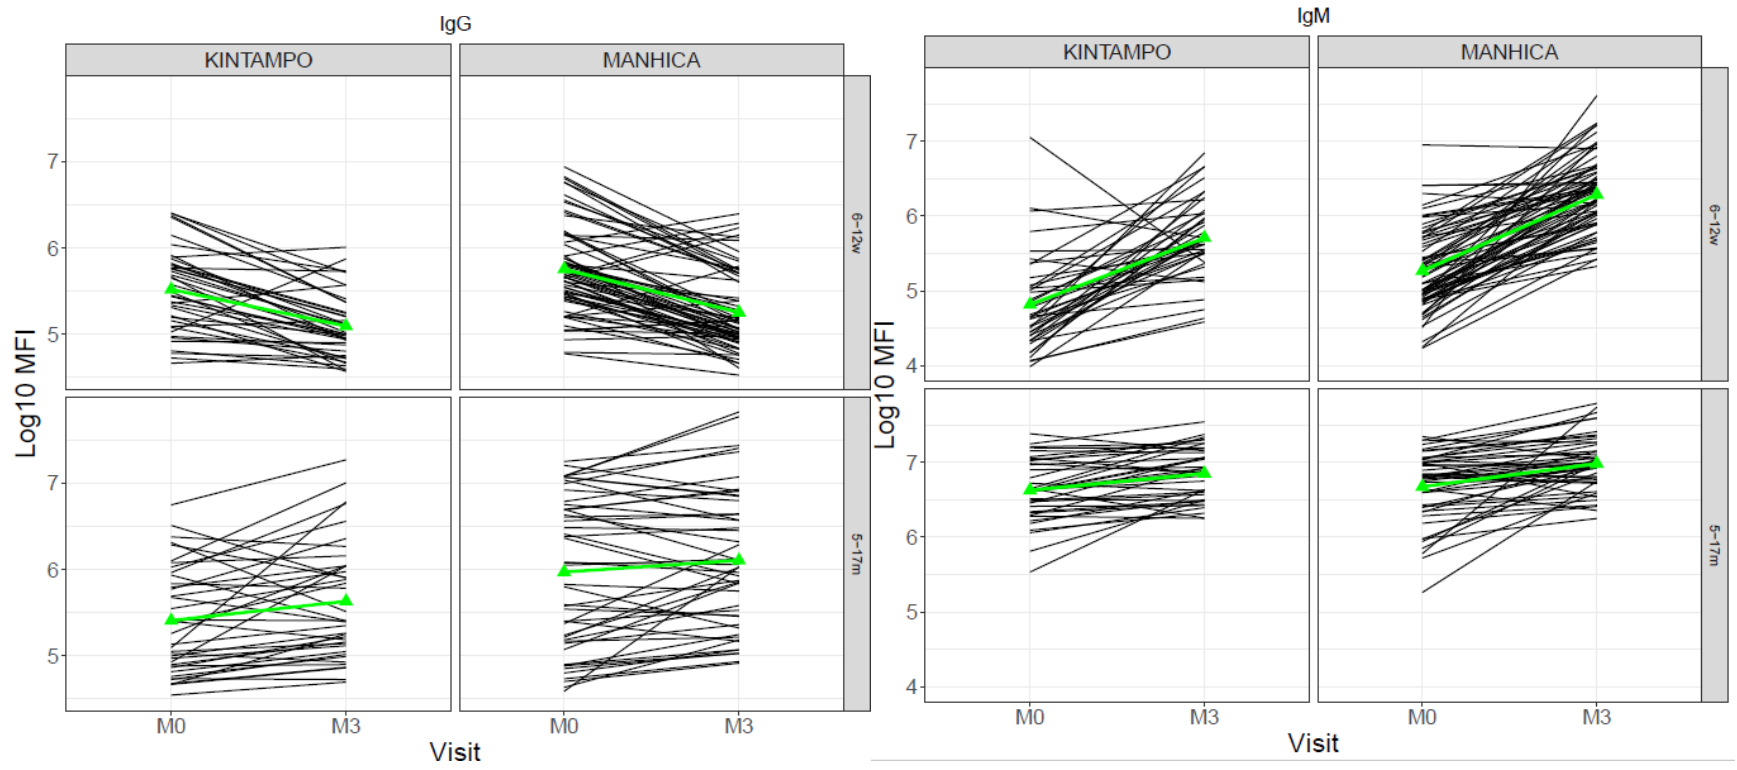

**Supplementary Table 1. Effect of RTS,S/AS01E vaccination on anti- $\alpha$ -Gal antibody responses at M3 by site and age cohort.** Interpretation in MFI scale (percent change for a units change in the predictor). P-Adj for multiple testing was done using Holm method.

| Antibody    | vaccine (RTS,S vs comparator) |      |       |                       |      |       |                        |      |       |                        |      |       |
|-------------|-------------------------------|------|-------|-----------------------|------|-------|------------------------|------|-------|------------------------|------|-------|
|             | Infants                       |      |       |                       |      |       | Children               |      |       |                        |      |       |
|             | Kintampo                      |      |       | Manhiça               |      |       | Kintampo               |      |       | Manhiça                |      |       |
|             | Coef(CI)                      | P    | P-Adj | Coef(CI)              | P    | P-Adj | Coef(CI)               | P    | P-Adj | Coef(CI)               | P    | P-Adj |
| <b>IgG</b>  | 69.55 (-3.89;199.13)          | 0.07 | 0.34  | -4.48 (-44.03;63.03)  | 0.86 | 1     | -3.58 (-67.05;182.18)  | 0.95 | 1     | -32.56 (-78.94;116.01) | 0.5  | 1     |
| <b>IgG1</b> | -28.55 (-70.03;70.37)         | 0.44 | 1     | -40.74 (-71.2;21.96)  | 0.15 | 0.92  | 29.41 (-48.24;223.54)  | 0.57 | 1     | -52.11 (-86.43;68.98)  | 0.25 | 1     |
| <b>IgG2</b> | 128.92 (5.83;395.17)          | 0.04 | 0.22  | -3.21 (-42.22;62.14)  | 0.9  | 1     | -12.16 (-75.78;218.54) | 0.84 | 1     | -45.48 (-85.23;101.23) | 0.35 | 1     |
| <b>IgG3</b> | 104.34 (-61.76;992.08)        | 0.39 | 1     | -54.06 (-87.99;75.75) | 0.25 | 1     | 7.46 (-79.28;457.15)   | 0.93 | 1     | -10.28 (-53.39;72.72)  | 0.74 | 1     |
| <b>IgG4</b> | 2.63 (-1.62;7.06)             | 0.22 | 0.89  | 1.97 (-2.53;6.68)     | 0.39 | 1     | -0.77 (-16.04;17.27)   | 0.93 | 1     | 2.53 (-27.76;45.54)    | 0.89 | 1     |
| <b>IgM</b>  | 28.83 (-44.07;196.77)         | 0.54 | 1     | 28.01 (-28.5;129.19)  | 0.4  | 1     | -31.92 (-60.81;18.26)  | 0.17 | 1     | 24.61 (-26.32;110.77)  | 0.4  | 1     |

CI = confidence interval

**Supplementary Table 2. Factors associated to the risk of clinical malaria in univariate logistic regression models stratified by site.** Anti- $\alpha$ -Gal antibody data at M3 and covariates from phase 3 participants. Results show those factors that affected the risk of clinical malaria when anti- $\alpha$ -Gal antibodies were taken into account. P-values were adjusted for multiple comparisons through Benjamini-Hochberg and Holm; those significant are in bold.

### Manhiça

| Antibody    | Antibody levels     | Age cohort          |                     | Sex                 |                       | WAZ                 |                     | HAZ                 |                      | Hb                            |                     | Exposure to malaria           | Maternal antibodies | Prior episode †  | Vaccine          | IgG at M0        | IgM at M0        |
|-------------|---------------------|---------------------|---------------------|---------------------|-----------------------|---------------------|---------------------|---------------------|----------------------|-------------------------------|---------------------|-------------------------------|---------------------|------------------|------------------|------------------|------------------|
|             | OR (CI)<br>P-val    | OR (CI)<br>P-val    | P-OR (CI)<br>val    | P-OR (CI)<br>val    | OR (CI)<br>P-val      | OR (CI)<br>P-val    | OR (CI)<br>P-val    | OR (CI)<br>P-val    | OR (CI)<br>P-val     | OR (CI)<br>P-val              | OR (CI)<br>P-val    | OR (CI)<br>P-val              | OR (CI)<br>P-val    | OR (CI)<br>P-val | OR (CI)<br>P-val | OR (CI)<br>P-val | OR (CI)<br>P-val |
| <b>IgG</b>  | 1.03<br>(0.58;1.79) | 0.12<br>(0.03;0.43) | 1.12<br>(0.48;2.63) | 0.72<br>(0.47;1.08) | 0.68 (0.45;1)<br>0.23 | 0.81<br>(0.53;1.25) | 1.18<br>(1.03;1.37) | 1.24<br>(1.02;1.53) | 0<br>(NA;2.083e+63)  | 0.73<br>(0.3;1.78)            | 1.81<br>(0.72;4.9)  | 0.54<br>(0.29;0.98)           |                     |                  |                  |                  |                  |
|             | <b>1</b>            | <b>0.004</b>        | <b>1</b>            | 0.36                |                       | <b>1</b>            | 0.056               | 0.14                | <b>1</b>             | <b>1</b>                      | 0.89                | 0.25                          |                     |                  |                  |                  |                  |
| <b>IgG1</b> | 1.24<br>(0.73;2.06) | 0.18<br>(0.05;0.52) | 1.13<br>(0.48;2.64) | 0.72<br>(0.47;1.08) | 0.69<br>(0.45;1.01)   | 0.81<br>(0.52;1.24) | 1.17<br>(1.02;1.36) | 1.25<br>(1.02;1.54) | 0<br>(NA;1.800e+63)  | 0.76<br>(0.32;1.89)           | 1.24<br>(0.61;2.55) | 0.59<br>(0.34;0.99)           |                     |                  |                  |                  |                  |
|             | <b>1</b>            | <b>0.006</b>        | <b>1</b>            | 0.36                | 0.23                  | <b>1</b>            | 0.056               | 0.14                | <b>1</b>             | <b>1</b>                      | 0.89                | 0.25                          |                     |                  |                  |                  |                  |
| <b>IgG2</b> | 1.13<br>(0.57;2.1)  | 0.17<br>(0.04;0.59) | 1.45<br>(0.58;3.69) | 0.68<br>(0.44;1.04) | 0.64<br>(0.41;0.97)   | 0.81<br>(0.5;1.28)  | 1.17<br>(1.02;1.37) | 1.29<br>(1.05;1.63) | 0<br>(NA;1.325e+108) | 0.72<br>(0.28;1.86)           | 1.71<br>(0.71;4.27) | 0.6<br>(0.32;1.09)            |                     |                  |                  |                  |                  |
|             | <b>1</b>            | <b>0.02</b>         | <b>1</b>            | 0.36                | 0.23                  | <b>1</b>            | 0.056               | 0.1                 | <b>1</b>             | <b>1</b>                      | 0.89                | 0.38                          |                     |                  |                  |                  |                  |
| <b>IgG3</b> | 0.08<br>(0;0.83)    | 0.35<br>(0.08;1.22) | 1.08<br>(0.46;2.56) | 0.67<br>(0.42;1.04) | 0.69<br>(0.45;1.01)   | 0.72<br>(0.44;1.15) | 1.19<br>(1.04;1.39) | 1.18<br>(0.97;1.47) | 0<br>(NA;1.396e+105) | 0.74<br>(0.31;1.84)           | 1.59<br>(0.81;3.21) | 0.84<br>(0.46;1.5)            |                     |                  |                  |                  |                  |
|             | <b>0.16</b>         | 0.24                | <b>1</b>            | 0.36                | 0.23                  | <b>1</b>            | <b>0.045</b>        | 0.3                 | <b>1</b>             | <b>1</b>                      | 0.89                | <b>1</b>                      |                     |                  |                  |                  |                  |
| <b>IgG4</b> | 0.06<br>(0;0.93)    | 0.33<br>(0.08;1.13) | 1.01<br>(0.43;2.4)  | 0.68<br>(0.43;1.05) | 0.68 (0.45;1)<br>0.23 | 0.7<br>(0.43;1.12)  | 1.21<br>(1.05;1.41) | 1.19<br>(0.97;1.47) | 0<br>(NA;1.549e+104) | 0.74<br>(0.3;1.83)            | 1.48<br>(0.77;2.9)  | 0.83<br>(0.45;1.5)            |                     |                  |                  |                  |                  |
|             | <b>0.17</b>         | 0.24                | <b>1</b>            | 0.36                | 0.23                  | <b>0.84</b>         | <b>0.04</b>         | 0.3                 | <b>1</b>             | <b>1</b>                      | 0.89                | 41                            |                     |                  |                  |                  |                  |
| <b>IgM</b>  | 0.36<br>(0.15;0.78) | 0.44<br>(0.13;1.43) | 0.87<br>(0.35;2.13) | 0.66<br>(0.42;1.01) | 0.67<br>(0.44;0.99)   | 0.78<br>(0.49;1.23) | 1.22<br>(1.06;1.43) | 1.18<br>(0.96;1.46) | 0<br>(NA;1.643e+63)  | 0.8 (0.33 ;<br>2.04) <b>1</b> | 1.65<br>(0.84;3.32) | 1.09 (0.53<br>;2.35) <b>1</b> |                     |                  |                  |                  |                  |
|             | <b>0.055</b>        | 0.24                | <b>1</b>            | 0.34                | 0.23                  | <b>1</b>            | <b>0.03</b>         | 0.3                 | <b>1</b>             | <b>1</b>                      | 0.89                |                               |                     |                  |                  |                  |                  |

## Kintampo

| Antibody    | Antibody levels                            | Age cohort                |           | Sex                      |           | WAS                      | HAZ                   | Hb                       | Exposure to malaria        | Maternal antibodies         | Prior episode †           | Vaccine                     | IgG at M0            | IgM at M0            |
|-------------|--------------------------------------------|---------------------------|-----------|--------------------------|-----------|--------------------------|-----------------------|--------------------------|----------------------------|-----------------------------|---------------------------|-----------------------------|----------------------|----------------------|
|             | OR (CI)<br>P-val                           | OR (CI)<br>P-val          | P-<br>val | OR (CI)<br>P-val         | P-<br>val | OR (CI)<br>P-val         | OR (CI)<br>P-val      | OR (CI)<br>P-val         | OR (CI)<br>P-val           | OR (CI)<br>P-val            | OR (CI)<br>P-val          | OR (CI)<br>P-val            | OR (CI)<br>P-val     | OR (CI)<br>P-val     |
| <b>IgG</b>  | 1.3<br>(0.54;3.58)<br>1                    | 0.78<br>(0.24;2.54)<br>1  |           | 1.83<br>(0.63;5.61)<br>1 |           | 1.11<br>(0.68;1.8)<br>1  | 1.25<br>(0.79;2.03) 1 | 1.08<br>(0.81;1.45)<br>1 | 1.04<br>(0.93;1.18)<br>1   | 1.21<br>(0.94;1.56)<br>0.69 | 1.82<br>(0.51;8.62)<br>1  | 0.41<br>(0.1;1.32)<br>0.82  | 0.69 (0.21 ; 2.26) 1 | 0.91 (0.51 ; 1.59) 1 |
| <b>IgG1</b> | 0.52<br>(0.22;1.2)<br>0.72                 | 1.18<br>(0.39;3.72)<br>1  |           | 1.97<br>(0.66;6.27)<br>1 |           | 0.99<br>(0.61;1.62)<br>1 | 1.2<br>(0.76;1.95) 1  | 1.05<br>(0.78;1.42)<br>1 | 1.05<br>(0.94;1.19)<br>1   | 1.07<br>(0.8;1.41)<br>0.84  | 1.59<br>(0.43;7.61)<br>1  | 0.4<br>(0.1;1.32)<br>0.82   | 1.02 (0.38 ; 2.77) 1 | 1.14 (0.66 ; 1.99) 1 |
| <b>IgG2</b> | 0.97<br>(0.45;2.32)<br>1                   | 1<br>(0.34;2.97)<br>1     |           | 1.95<br>(0.67;6.01)<br>1 |           | 0.99<br>(0.61;1.61)<br>1 | 1.2<br>(0.75;1.94) 1  | 1.06<br>(0.79;1.42)<br>1 | 1.05<br>(0.94;1.18)<br>1   | 1.17<br>(0.92;1.5)<br>0.84  | 1.67<br>(0.46;7.98)<br>1  | 0.44 (0.11; .42) 0.82       | 0.95 (0.29 ; 3.14) 1 | 1.04 (0.62 ; 1.74) 1 |
| <b>IgG3</b> | 2656.49<br>(0.07;2006<br>695789.1)<br>0.79 | 0.63<br>(0.194;2.03)<br>1 |           | 1.72<br>(0.59;5.3) 1     |           | 1.18<br>(0.73;1.93)<br>1 | 1.27<br>(0.8;2.07) 1  | 1.13<br>(0.84;1.53)<br>1 | 1.02<br>(0.91;1.16)<br>1   | 1.22<br>(0.95;1.58)<br>0.69 | 2.09<br>(0.58;10.01)<br>1 | 0.42<br>(0.11;1.35)<br>0.82 | 0.7 (0.24 ; 1.98) 1  | 0.82 (0.46 ; 1.43) 1 |
| <b>IgG4</b> | 8.01<br>(0.01;1642<br>776.4) 1             | 0.86<br>(0.28;2.59)<br>1  |           | 1.76<br>(0.61;5.39)<br>1 |           | 1.08<br>(0.68;1.75)<br>1 | 1.24<br>(0.78;2.02) 1 | 1.08<br>(0.81;1.46)<br>1 | 1.05<br>(0.94;1.18)<br>1   | 1.18<br>(0.9;1.57)<br>0.84  | 1.97<br>(0.54;9.52)<br>1  | 0.43<br>(0.11;1.36)<br>0.82 | 0.87 (0.33 ; 2.36) 1 | 0.95 (0.56 ; 1.6) 1  |
| <b>IgM</b>  | 0.74<br>(0.34;1.54)<br>1                   | 1.98<br>(0.36;11) 1       |           | 1.72<br>(0.59;5.28)<br>1 |           | 0.99<br>(0.59;1.66)<br>1 | 1.24 (0.78;2)<br>1    | 1.04<br>(0.76;1.42)<br>1 | 1.11<br>(0.97;1.3)<br>0.71 | 1.17<br>(0.9;1.55)<br>0.84  | 1.82<br>(0.51;8.61)<br>1  | 0.42<br>(0.11;1.33)<br>0.82 | 0.94 (0.36 ; 2.5) 1  | 1.4 (0.64 ; 3.1) 1   |
